## Best Paper Award 2001

We are pleased to announce that the winner of the award for the Best Paper 2001 is Laura McMahon for the paper entitled Assembly of *C. elegans* apical junctions involves positioning and compaction by LET-413 and protein aggregation by the MAGUK protein DLG-1 (McMahon, Legouis, Vonesch and Labouesse. *J. Cell Sci.* **114**, 2265-2277).

The prize, \$1,000, is awarded annually to the first author of the paper that is judged by the Editors and Editorial Board to be the best published in the Journal that year. To be considered for the 2001 prize, the first author must be a student or a postdoc of less than five years standing.

Laura McMahon was born in Londonderry, Northern Ireland, and lived there until she 'escaped' to Edinburgh University where she started studying Geophysics and ended up with a degree in Zoology (not being very good at making up her mind!), specialising in animal behaviour and parasitology. From here, she was lured to the Wellcome Centre of Molecular Parasitology in Glasgow by her fascination for parasites, only to embark on a PhD studying the cuticle and epidermal function of the non-parasitic nematode *Caenorhabditis elegans* under the supervision of Dr Iain Johnstone. Luckily, she soon saw the advantages of working with a non-parasitic worm and became interested in the embryonic development of *C. elegans*; she was

especially interested in working with genes essential for the development of the epidermis and production of the cuticle. Laura characterised the phenotypes of several deletions and the pattern of a novel antibody recognising the C-terminus of the cuticle collagen DPY-7. This work has yielded new insights into collagen synthesis and cuticle production in *C. elegans*.

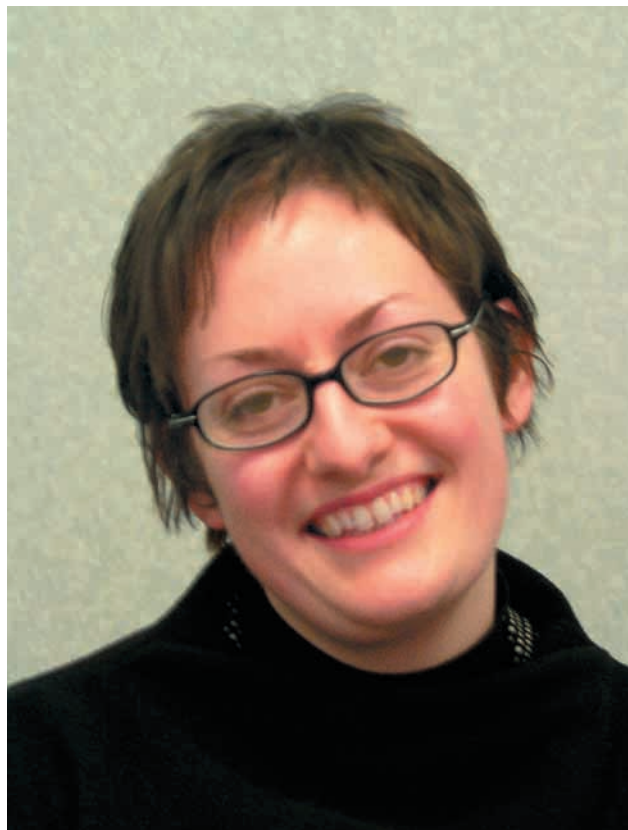

After her PhD in Glasgow, Laura wished to travel further afield and found the perfect way to do this by taking a postdoc position (which was funded by an E.E.C. network grant) in the laboratory of Dr Michel Labouesse at the I.G.B.M.C. in Strasbourg. The project, which was reported in her paper

(McMahon et al., 2001), was motivated by the apparently unique apical junctions seen in *C. elegans* epidermal cells, which were previously named adherens junctions, and by work by Renaud Legouis on LET-413 showing that it is required for the assembly of these junctions (Legouis et al., 2000). She found that these junctions were much more complex than previously thought, consisting of several layers and many different proteins. One of the component proteins of these so-called 'adherens' junctions is the MAGUK protein DLG-1, a homologue of the Dlg/SAP97 proteins found in septate or tight junctions in other organisms. She also found that DLG-1 is required for junction assembly, acting downstream of LET-413. There is still much work to be done on this exciting project.

After her postdoc in France, Laura returned to Scotland, where she is currently working as a technical advisor for Invitrogen Ltd in Paisley.

**Fiona Watt**  
(Editor-in-Chief)

### References

- McMahon, L., Legouis, R., Vonesch, J. L. and Labouesse, M. (2001). Assembly of *C. elegans* apical junctions involves positioning and compaction by LET-413 and protein aggregation by the MAGUK protein DLG-1. *J. Cell Sci.* **114**, 2265-2277.
- Legouis, R., Gansmuller, A., Sookhareea, S., Boshier, J. M., Baillie, D. L. and Labouesse M. (2000). LET-413 is a basolateral protein required for the assembly of adherens junctions in *Caenorhabditis elegans*. *Nat. Cell Biol.* **2**, 415-422.

### Year 2002 Travelling Fellowships

JCS offers fellowships of up to US\$4000 to graduate students and post-docs wishing to make collaborative visits to other laboratories. These are designed to cover the cost of travel and other expenses, and there is no restriction on nationality. Applicants should be working in the field of cell biology and intend to visit a laboratory in another country. Each application is judged on the excellence of the candidate, and the importance and innovative quality of the work to be done.

Application forms can be downloaded from our Web site at <http://jcs.biologists.org>. Please send the completed application form, to the Production Editor at the address below.

Journal of Cell Science Editorial Office,  
The Company of Biologists Limited, Bidder Building,  
140 Cowley Road, Cambridge  
CB4 0DL, UK

Deadline: 30 June 2002

## Commentaries

JCS Commentaries highlight and critically discuss recent exciting work that will interest those working in cell biology, molecular biology, genetics and related disciplines. These short reviews are commissioned from leading figures in the field and are subject to rigorous peer-review and in-house editorial appraisal. Each issue of the journal contains at least two Commentaries. JCS thus provides readers with more than 50 Commentaries over the year, which cover the complete spectrum of cell science. The following are just some of the Commentaries appearing in JCS over the coming months.

Integrins and apoptosis *David Cheresh*

Hedgehog signalling *Phillip Ingham*

Nuclear envelope breakdown *Jan Ellenberg*

Signalling selectivity of GSK3 *Jim Woodgett*

mRNA localization *Robert Singer*

Flagellum/axoneme biogenesis *Joel Rosenbaum*

The biological activities of collagen fragments *Zena Werb*

The molecular biology of the centriole *Susan Dutcher*

Interactions between Ras- and Rho-dependent signalling pathways in cell transformation *Chris Marshall*

Organelle dynamics *Jennifer Lippincott-Schwartz*

Spindle asymmetry *Andrea Brand*

Tensegrity *Donald Ingber*

Interactions of kinesin motors with cargo *Bruce Schnapp*

Lipid-partitioning and the insertion of membrane proteins *Vishwanath Lingappa*

Expanding the view of inositol signaling: the genomic era *John York*

The functions of NF-ATc *Anjana Rao*

Although we discourage submission of unsolicited Commentaries to the journal, ideas for future articles – in the form of a short proposal and some key references – are welcome and should be sent to the Executive Editor at the address below.

Journal of Cell Science, Bidder Building, 140 Cowley Rd, Cambridge, UK  
CB4 0DL

E-mail: [jcs@biologists.com](mailto:jcs@biologists.com); <http://jcs.biologists.org>
